# Supplementary material for: Integrated care of severe infectious diseases to people with substance use disorders; a systematic review
Source: Springer Nature journal article supplement (doi:10.1186/s12879-019-3918-2), 2019-04-04
Supplement: MOESM4 [file 16609758]

| CONSORT 2010              |                    | Interventions with opioid agonist therapy                                                                                             |                                                         |                          |                             | Interventions without opioid agonist therapy |                       |                           |         |
|---------------------------|--------------------|---------------------------------------------------------------------------------------------------------------------------------------|---------------------------------------------------------|--------------------------|-----------------------------|----------------------------------------------|-----------------------|---------------------------|---------|
|                           |                    | Batki, S.L. et al (2002)                                                                                                              | Bruce, D.R. et al (2012)                                | Lucas, G.M. et al (2010) | Tetrault, J.M. et al (2012) | Grossl, E.J. et al (2017)                    | Ho, S.B. et al (2015) | Simoni, J.M. et al (2007) |         |
| Section/Topic             | Item no            | Checklist item                                                                                                                        | Numbers refer to the pages in the original publications |                          |                             |                                              |                       |                           |         |
| <i>Title and abstract</i> |                    |                                                                                                                                       |                                                         |                          |                             |                                              |                       |                           |         |
|                           | 1a                 | Identification as a randomized trial in the title                                                                                     | Yes                                                     | No                       | Yes                         | No                                           | Yes                   | No                        | Yes     |
|                           | 1b                 | Structured summary of the trial design, methods, results, and conclusions                                                             | Yes                                                     | Yes                      | Yes                         | No                                           | Yes                   | Yes                       | Yes     |
|                           | 1b1                | Title                                                                                                                                 | Yes                                                     | No                       | Yes                         | No                                           | Yes                   | No                        | Yes     |
|                           | 1b2                | Authors contact details                                                                                                               | Yes                                                     | Yes                      | Yes                         | Yes                                          | Yes                   | Yes                       | Yes     |
|                           | 1b3                | Trial design                                                                                                                          | Yes                                                     | Yes                      | Yes                         | Yes                                          | Yes                   | Yes                       | Yes     |
|                           | 1b4                | <i>Methods</i>                                                                                                                        |                                                         |                          |                             |                                              |                       |                           |         |
|                           | 1b4a               | Participants                                                                                                                          | Yes                                                     | No                       | Yes                         | Yes                                          | Yes                   | Yes                       | Yes     |
|                           | 1b4b               | Interventions                                                                                                                         | Yes                                                     | Yes                      | Yes                         | Yes                                          | Yes                   | Yes                       | Yes     |
|                           | 1b4c               | Objective                                                                                                                             | Yes                                                     | No                       | Yes                         | No                                           | Yes                   | Yes                       | Yes     |
|                           | 1b4d               | Outcomes                                                                                                                              | Yes                                                     | No                       | Yes                         | Yes                                          | Yes                   | Yes                       | Yes     |
|                           | 1b4e               | Randomization                                                                                                                         | Yes                                                     | Yes                      | Yes                         | Yes                                          | Yes                   | Yes                       | Yes     |
|                           | 1b4f               | Blinding (masking)                                                                                                                    | No                                                      | No                       | No                          | No                                           | No                    | No                        | No      |
|                           | 1b5                | <i>Results</i>                                                                                                                        |                                                         |                          |                             |                                              |                       |                           |         |
|                           | 1b5a               | Number randomized                                                                                                                     | Yes                                                     | Yes                      | No                          | Yes                                          | Yes                   | Yes                       | Yes     |
|                           | 1b5b               | Recruitment                                                                                                                           | No                                                      | Yes                      | No                          | No                                           | Yes                   | Yes                       | Yes     |
|                           | 1b5c               | Number analyzed                                                                                                                       | Yes                                                     | Yes                      | No                          | Yes                                          | Yes                   | Yes                       | Yes     |
|                           | 1b5d               | Outcomes                                                                                                                              | Yes                                                     | Yes                      | Yes                         | Yes                                          | Yes                   | Yes                       | Yes     |
|                           | 1b5e               | Harms                                                                                                                                 | No                                                      | Yes                      | Yes                         | No                                           | No                    | Yes                       | No      |
| 1b6                       | Conclusion         | Yes                                                                                                                                   | Yes                                                     | Yes                      | Yes                         | Yes                                          | Yes                   | Yes                       |         |
| 1b7                       | Trial registration | No                                                                                                                                    | No                                                      | Yes                      | No                          | Yes                                          | Yes                   | No                        |         |
| 1b8                       | Funding            | No                                                                                                                                    | No                                                      | Yes                      | No                          | Yes                                          | Yes                   | Yes                       |         |
| <i>Introduction</i>       |                    |                                                                                                                                       |                                                         |                          |                             |                                              |                       |                           |         |
| Background and objectives | 2a                 | Scientific background and explanation of rationale                                                                                    | 284                                                     | 208                      | 704                         | 434                                          | 2                     | 2006                      |         |
|                           | 2b                 | Specific objectives or hypotheses                                                                                                     | 284                                                     | 208                      | 704                         | 434                                          | 2                     | 2006                      | 4       |
| <i>Methods</i>            |                    |                                                                                                                                       |                                                         |                          |                             |                                              |                       |                           |         |
| Trial design              | 3a                 | Description of trial design (such as parallel, factorial) including allocation ratio                                                  | 285                                                     | 208                      | 705                         | 434                                          | 2                     | 2006                      | 4       |
|                           | 3b                 | Important changes to methods after trial commencement (such as eligibility criteria), with reasons                                    | 285-287                                                 | 207-208                  | -                           | 434                                          | -                     | 2008                      | -       |
| Participants              | 4a                 | Eligibility criteria for participants                                                                                                 | 284-285                                                 | 208                      | 705                         | 434                                          | 2                     | 2008                      | 4       |
|                           | 4b                 | Settings and locations where the data were collected                                                                                  | 284                                                     | 208                      | 704-705                     | -                                            | 2                     | 2008                      | 4       |
| Intervention              | 5                  | The interventions for each group with sufficient details to allow replication, including how and when they were actually administered | 285-287                                                 | 208                      | 705                         | 435                                          | 2                     | 2007 and 2008             | 5 and 6 |
| Outcomes                  | 6a                 | Completely defined pre-specified primary and secondary outcome measures, including how and when they were assessed                    | 287-288                                                 | 208                      | 706                         | 435                                          | 2                     | 2008                      | 6       |
|                           | 6b                 | Any changes to trial outcomes after the trial commenced, with reasons                                                                 | -                                                       | 208                      | -                           | -                                            | 3 and 4               | -                         | -       |

|                                                             |     |                                                                                                                                                                                             |              |     |     |             |         |               |    |
|-------------------------------------------------------------|-----|---------------------------------------------------------------------------------------------------------------------------------------------------------------------------------------------|--------------|-----|-----|-------------|---------|---------------|----|
| <i>Sample size</i>                                          | 7a  | How sample size was determined                                                                                                                                                              | -            | -   | 706 | 435         | 2       | 2008          | 4  |
|                                                             | 7b  | When applicable, explanation of any interim analyses and stopping guidelines                                                                                                                | -            | -   | 706 | -           | -       | 2014.e1       | -  |
| <i>Randomization: Sequence generation</i>                   | 8a  | Methods used to generate the random allocation sequence                                                                                                                                     | 285          | -   | 705 | -           | 2       | -             | 4  |
|                                                             | 8b  | Type of randomization; details of any restriction (such as blocking and block size)                                                                                                         | -            | 208 | 705 | -           | 2       | 2014.e1       | 4  |
| <i>Randomization: Allocation concealment mechanism</i>      | 9   | Mechanism used to implement the random allocation sequence (such as sequentially numbered containers), describing any steps taken to conceal the sequence until interventions were assigned | 285          | 208 | 705 | 435 and 436 | 2       | -             | 4  |
| <i>Randomization: Implementation</i>                        | 10  | Who generated the random allocation sequence, who enrolled participants, and who assigned participants to interventions                                                                     | 285          | 208 | 705 | 435         | 2       | 2008          | 4  |
| <i>Blinding</i>                                             | 11a | If done, who was blinded after assignment to interventions (for example, participants, care providers, those assessing outcomes) and how                                                    | -            | -   | -   | -           | -       | -             | 4  |
|                                                             | 11b | If relevant, description of the similarity of interventions                                                                                                                                 | 285-287      | -   | -   | -           | -       | -             | 4  |
| <i>Statistical methods</i>                                  | 12a | Statistical methods used to compare groups for primary and secondary outcomes                                                                                                               | 287-288      | 209 | 706 | 435         | 3 and 4 | 2014e1        | 6  |
|                                                             | 12b | Methods for additional analyses, such as subgroups analyses and adjusted analyses                                                                                                           | 287-288      | -   | 706 | 436         | 3 and 4 | 2014e2        | 6  |
| <i>Results</i>                                              |     |                                                                                                                                                                                             |              |     |     |             |         |               |    |
| <i>Participant flow (a diagram is strongly recommended)</i> | 13a | For each group, the number of participants who were randomly assigned, received intended treatment, and were analysed for the primary outcome                                               | 288-289      | 209 | 706 | 434 and 436 | 4       | 2008          | 4  |
|                                                             | 13b | For each group, losses and exclusions after randomization, together with reasons                                                                                                            | 285, 288-289 | -   | 706 | 436         | 4       | 2009 and 2009 | 7  |
| <i>Recruitment</i>                                          | 14a | Dates defining the periods of recruitment and follow-up                                                                                                                                     | 284          | 209 | 705 | -           | 3       | 2006          | 4  |
|                                                             | 14b | Why the trial ended or was stopped                                                                                                                                                          | 284          | 209 | 705 | -           | 3 and 4 | 2008          | -  |
| <i>Baseline data</i>                                        | 15  | A table showing baseline demographic and clinical characteristics for each group                                                                                                            | 286          | 207 | 707 | 436         | 5 and 6 | 2009          | 15 |

|                                |     |                                                                                                                                                    |         |         |         |             |            |               |               |
|--------------------------------|-----|----------------------------------------------------------------------------------------------------------------------------------------------------|---------|---------|---------|-------------|------------|---------------|---------------|
| <i>Numbers analyzed</i>        | 16  | For each group number of participants (denominator) included in each analysis and whether the analysis was by original assigned groups             | 288-289 | 209     | 707-708 | 436         | 5 and 6    | 2009 and 2010 | 15 and 16     |
| <i>Outcomes and estimation</i> | 17a | For each primary and secondary outcome, results for each group, and the estimated effect size and its precision (such as 95 % confidence interval) | 288-289 | -       | 706-708 | 436 and 437 | 4          | 2008          | 4, 6 and 16   |
|                                | 17b | For binary outcomes, presentation of both absolute and relative effect sizes is recommended.                                                       | 288-289 | -       | 706-708 | -           | 4, 5 and 6 | 2010          | 16            |
| <i>Ancillary analyses</i>      | 18  | Results of any other analyses performed, including subgroup analyses and adjusted analyses, distinguishing pre-specified from exploratory          | 288-289 | -       | 707-708 | -           | 7          | -             | 16            |
| <i>Harms</i>                   | 19  | All important harms or unintended effects in each group                                                                                            | 288-290 | 209     | 707     | 436         | 4          | 2010          | 7 and 8       |
| <i>Discussion</i>              |     |                                                                                                                                                    |         |         |         |             |            |               |               |
| <i>Limitations</i>             | 20  | Trial limitations, addressing sources of potential bias, imprecision, and, if relevant, multiplicity of analyses                                   | 291     | 211     | 709-710 | 438         | 7          | 2013          | 11            |
| <i>Generalisability</i>        | 21  | Generalisability (external validity, applicability) of the trial findings                                                                          | 291     | 211     | 710     | 438         | 7          | 2012 and 2013 | 11            |
| <i>Interpretation</i>          | 22  | Interpretation consistent with results, balancing benefits and harms, and considering other relevant evidence                                      | 291     | 210-211 | 710     | 438         | 7          | 2012 and 2013 | 9, 10, and 11 |
| <i>Other informations</i>      |     |                                                                                                                                                    |         |         |         |             |            |               |               |
| <i>Registration</i>            | 23  | Registration number and name of trial registry                                                                                                     | No      | No      | Yes     | Yes         | Yes        | Yes           | No            |
| <i>Protocol</i>                | 24  | Where the full trial protocol can be accessed, if available                                                                                        | No      | Yes     | Yes     | Yes         | Yes        | Yes           | No            |
| <i>Funding</i>                 | 25  | Sources of funding and other support (such as supply of drugs), role of funders                                                                    | No      | Yes     | Yes     | Yes         | Yes        | Yes           | Yes           |
