# Supplementary material for: Integrated care of severe infectious diseases to people with substance use disorders; a systematic review
Source: Springer Nature journal article supplement (doi:10.1186/s12879-019-3918-2), 2019-04-04
Supplement: MOESM5 [file 16609758]

| Author/year of publication<br>Newcastle-Ottawa scale (NOS)                     | Acceptable                                                                                                                                                                                                                                                                        | Interventions with opioid agonist treatment |                           | Intervention without opioid agonist treatment |
|--------------------------------------------------------------------------------|-----------------------------------------------------------------------------------------------------------------------------------------------------------------------------------------------------------------------------------------------------------------------------------|---------------------------------------------|---------------------------|-----------------------------------------------|
|                                                                                |                                                                                                                                                                                                                                                                                   | Achmad, Y.M. et al (2009)                   | Morozova, O. et al (2013) | Sánchez, G.C. et al (2012)                    |
| <i>Selection</i>                                                               |                                                                                                                                                                                                                                                                                   |                                             |                           |                                               |
| <i>Representativeness of the exposed</i>                                       | Representative of adult with substance use disorder in the intervention group                                                                                                                                                                                                     | Yes                                         | Yes                       | Yes                                           |
| <i>Selection of non-exposed</i>                                                | Drawn from some community as exposed                                                                                                                                                                                                                                              | No                                          | No                        | No                                            |
| <i>Ascertainment of exposure</i>                                               | Secured records, structured interviews                                                                                                                                                                                                                                            | Yes                                         | Yes                       | Yes                                           |
| <i>Demonstration that outcome of interest was no present at start of study</i> | Only people with SUD infected by HCV, HBV, HIV, or TBC                                                                                                                                                                                                                            | Yes                                         | Yes                       | Yes                                           |
| <i>Risk of low quality (low-medium-high)</i>                                   | Low: 0 "No", medium: 1-2 "No", high: $\geq 3$ "No"                                                                                                                                                                                                                                | Medium                                      | Medium                    | Medium                                        |
| <i>Comparability</i>                                                           |                                                                                                                                                                                                                                                                                   |                                             |                           |                                               |
| <i>Study control for age/sex?</i>                                              | Yes                                                                                                                                                                                                                                                                               | Yes                                         | Yes                       | No                                            |
| <i>Study control for at least three additional factors at baseline?</i>        | Injecting substance use, homeless, employment status, ethnicity, marital status, education, HIV RNA, CD4 cell counts, HIV-HCV coinfections, psychiatric disorder, current or previous substance use, prior HBV/HCV/HIV/TBC treatment, advanced fibrosis (Metavir stages F3 or F4) | Yes                                         | Yes                       | No (Compared two different groups)            |
| <i>Risk of low quality (low-medium-high)</i>                                   | Low: 0 "No", medium: 1 "No", high: 2 "No".                                                                                                                                                                                                                                        | Low                                         | Low                       | High                                          |
| <i>Outcome</i>                                                                 |                                                                                                                                                                                                                                                                                   |                                             |                           |                                               |
| <i>Assessment of outcome</i>                                                   | Independent blind assessment, record linkage                                                                                                                                                                                                                                      | Yes                                         | Yes                       | Yes                                           |
| <i>Was follow-up long enough for outcomes to occur</i>                         | HCV: SVR (12 weeks posttreatment), HIV: at least three months, TBC: treatment completion, HBV: switch to undetectable HBV DNA, HBsAg, or HBeAg                                                                                                                                    | Yes                                         | Yes                       | Yes                                           |
| <i>Adequacy of follow up of cohorts</i>                                        | Complete follow up, or follow up above 80 % of participants initiated treatment                                                                                                                                                                                                   | No                                          | Yes                       | Yes                                           |
| <i>Risk of low quality (low-medium-high)</i>                                   | Low: 0 "No", medium: 1 "No", high: $\geq 2$ "No".                                                                                                                                                                                                                                 | Medium                                      | Low                       | Low                                           |
| Score (points)*                                                                |                                                                                                                                                                                                                                                                                   | 7                                           | 8                         | 6                                             |

\* The score is graded from 0 to 10 points based on the three main categories "selection", "comparability" and "outcome". The scale identifies threshold score distinguishing between 'good' and 'poor' quality studies
